# Supplementary material
Source: PubMed Central journal article supplement (PMC6495751)
Supplement: AEM.00106-19-s0001.pdf [file AEM.00106-19-s0001.pdf]

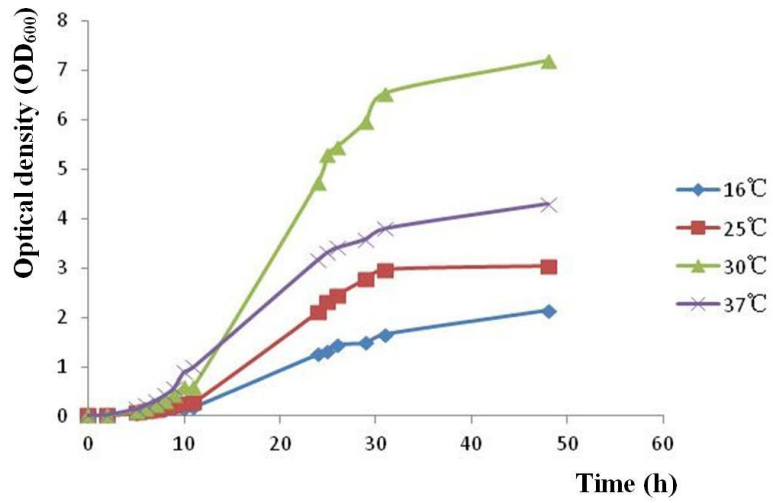

1

2 Fig. S1 Growth curves of *B. gladioli* HDXY-02 at different temperatures. Data are representative

3 of three independent biological replicates performed at least in triplicates.

4

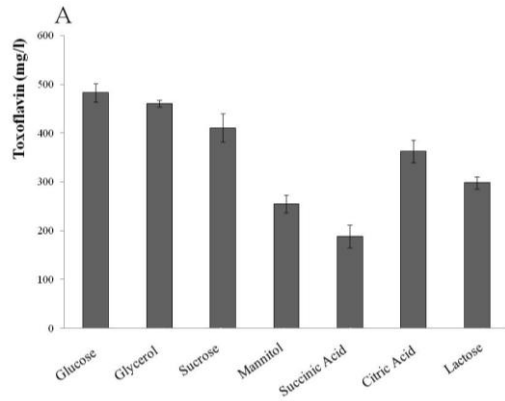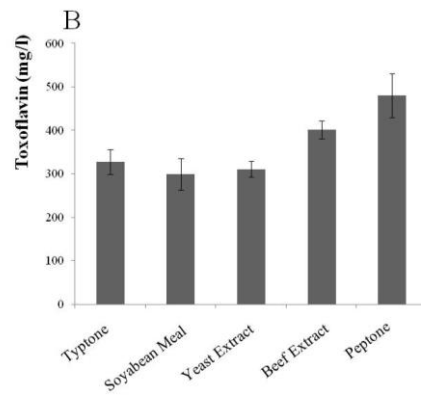

5

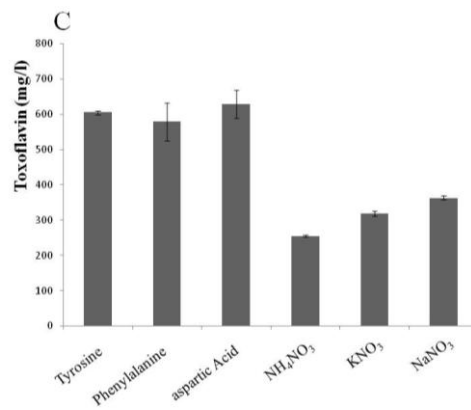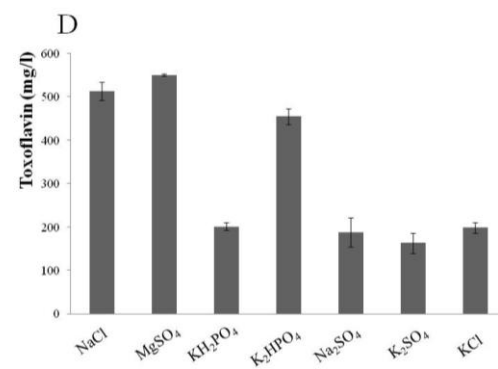

6

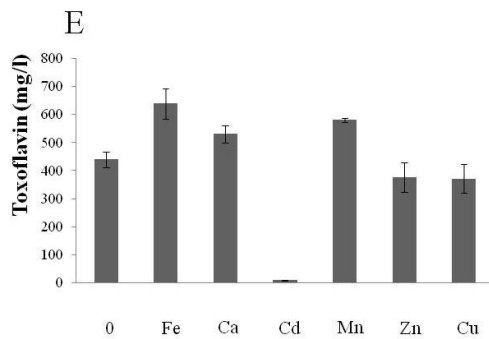

7

8 Fig. S2 Effect of different carbon (a), nitrogen (b), amino acids and nitrates (c), inorganic  
9 salts (d), metal ions (e) on toxoflavin production screened by one variable at a time  
10 (OVAT) approach.

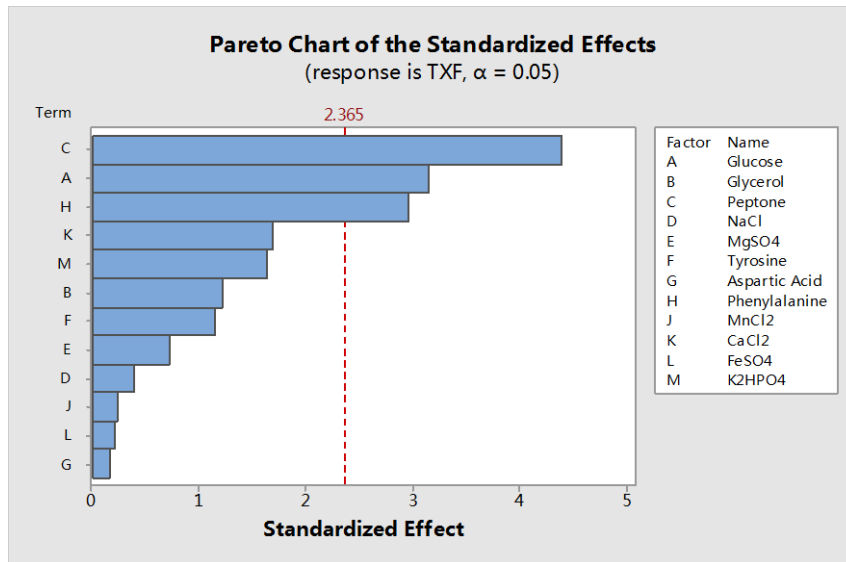

11

12 Fig. S3 Pareto chart of standard effects of 12 factor on toxoflavin production. Glucose,  
 13 peptone and phenylalanine were screened as important factors. toxoflavin (TXF)

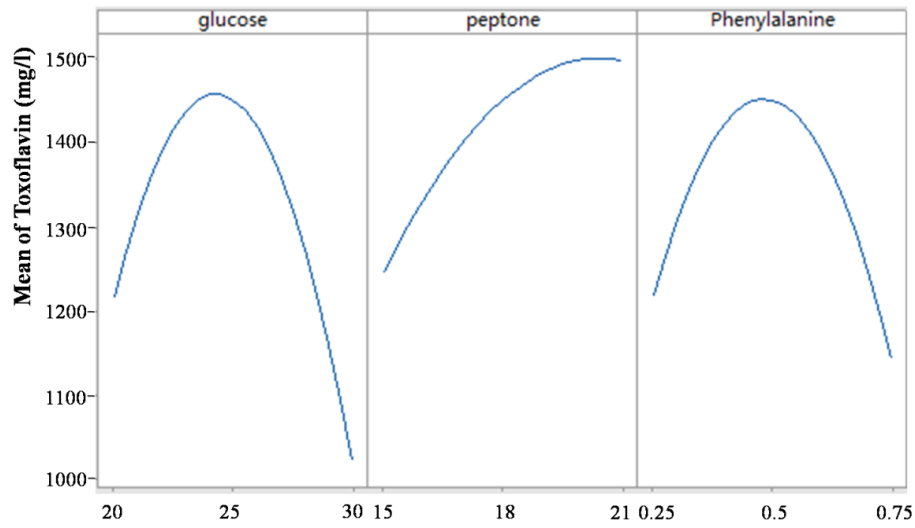

14

15 Fig. S4 Main effect plot of toxoflavin with fitted means signified the optimum

16 concentration of Glucose, peptone and phenylalanine for highest toxoflavin production.

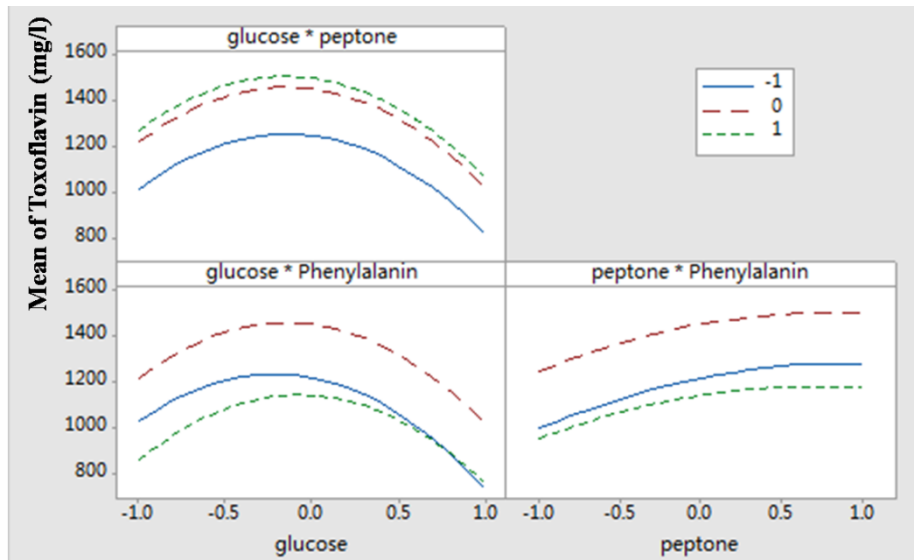

17

18 Fig. S5 Interaction plot of toxoflavin with fitted means demonstrated the effect of  
 19 interaction of the variable for toxoflavin production.

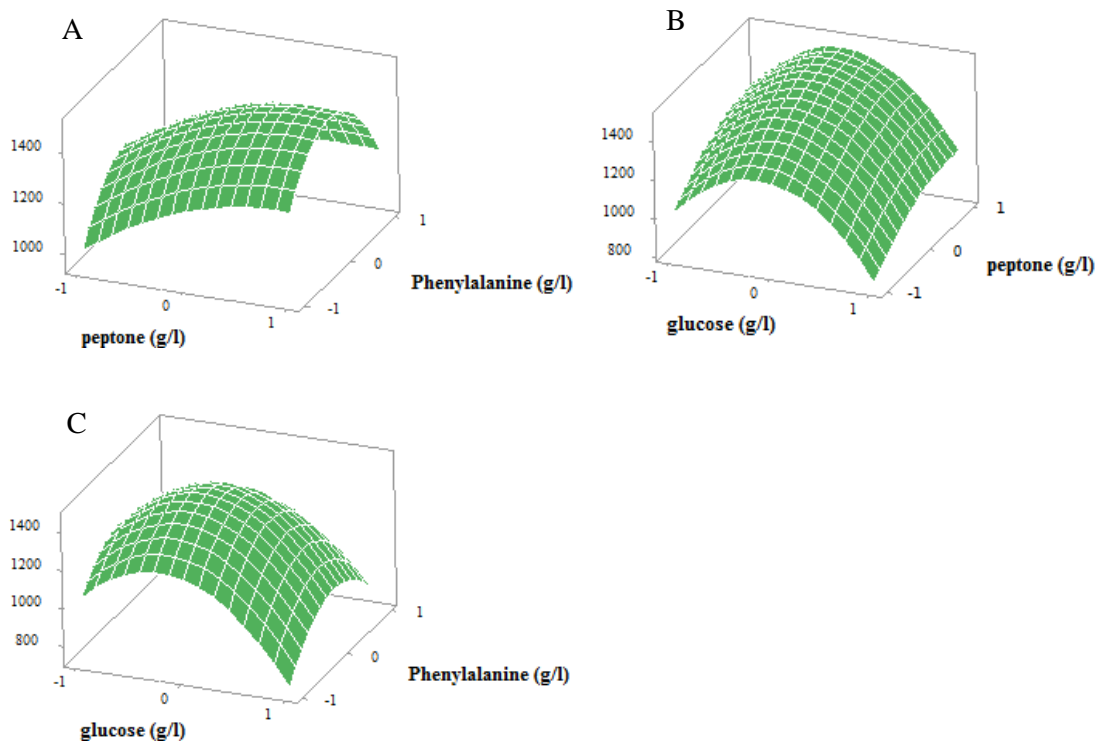

20

21 Fig. S6 Response surface of toxoflavin produced by HDXY-02. **a** effects of peptone,  
 22 phenylalanine and their mutual interaction on toxoflavin production. **b** effects of glucose,  
 23 peptone and their mutual interaction on toxoflavin production. **c** effects of glucose,  
 24 phenylalanine and their mutual interaction on toxoflavin production

25 Table S1 Experimental variables with their higher and lower levels selected for PBD.

| Factors                               | Variables       | Low level(-1) | High level(+1) |
|---------------------------------------|-----------------|---------------|----------------|
| Glucose (g/l)                         | x <sub>1</sub>  | 6             | 18             |
| Glycerol (ml/l)                       | x <sub>2</sub>  | 4             | 20             |
| Peptone (g/l)                         | x <sub>3</sub>  | 10            | 25             |
| NaCl (g/l)                            | x <sub>4</sub>  | 0             | 5              |
| MgSO <sub>4</sub> (g/l)               | x <sub>5</sub>  | 0             | 2              |
| Tyrosine(g/l)                         | x <sub>6</sub>  | 0.1           | 0.5            |
| Aspartic acid(g/l)                    | x <sub>7</sub>  | 0.1           | 0.5            |
| Phenylalanine(g/l)                    | x <sub>8</sub>  | 0.1           | 0.5            |
| MnCl <sub>2</sub> (mM)                | x <sub>9</sub>  | 0             | 1              |
| CaCl <sub>2</sub> (mM)                | x <sub>10</sub> | 0             | 1              |
| FeSO <sub>4</sub> (mM)                | x <sub>11</sub> | 0             | 1              |
| K <sub>2</sub> HPO <sub>4</sub> (g/l) | x <sub>12</sub> | 0.5           | 2.5            |

26

27

28 Table S2 Selected variable range selected for toxoflavin production using BBD.

| Factors            | Symbol | Levels |     |      |
|--------------------|--------|--------|-----|------|
|                    |        | -1     | 0   | 1    |
| Glucose(g/l)       | $x_1$  | 20     | 25  | 30   |
| Peptone(g/l)       | $x_2$  | 15     | 18  | 21   |
| Phenylalanine(g/l) | $x_3$  | 0.25   | 0.5 | 0.75 |

29
